# Supplementary material for: Long-Term In Vitro Culture of the Syphilis Spirochete Treponema pallidum subsp. pallidum
Source: PubMed Central journal article supplement (PMC6020297; doi:10.1128/mbio.01153-18), 2018-06-26

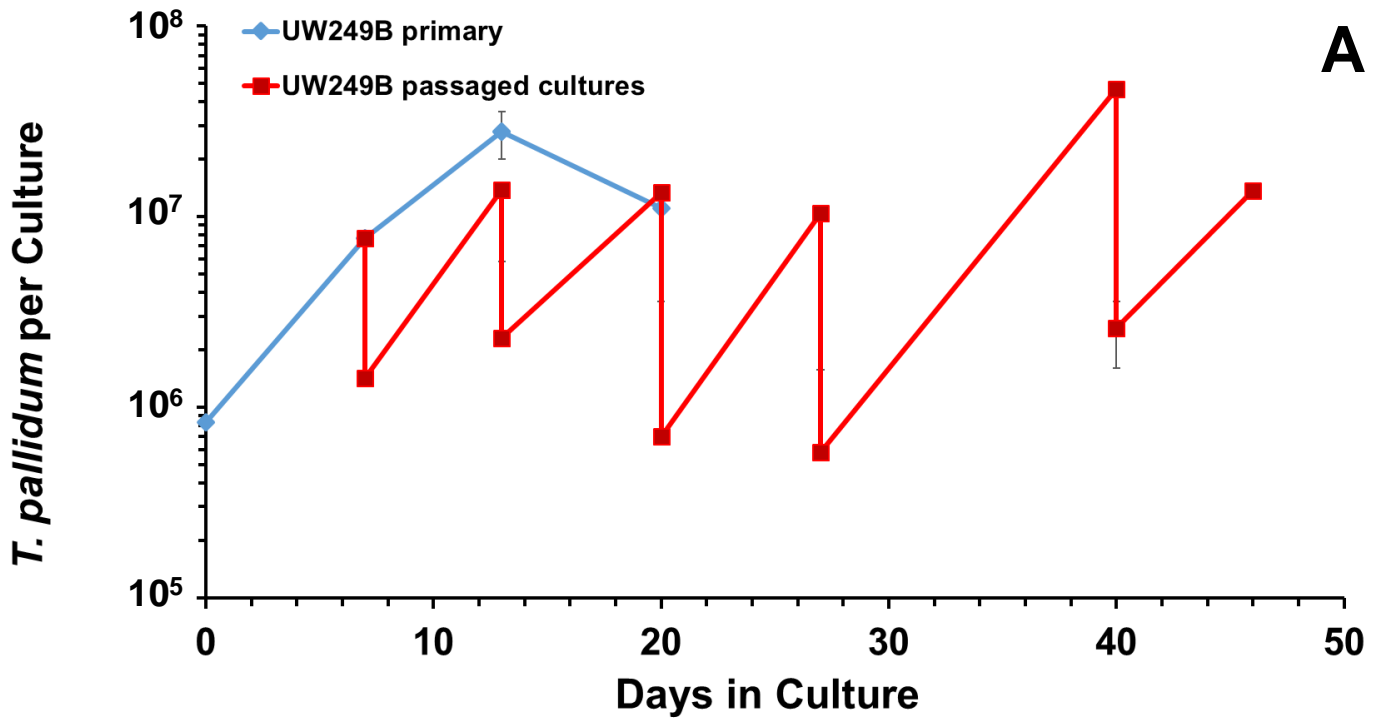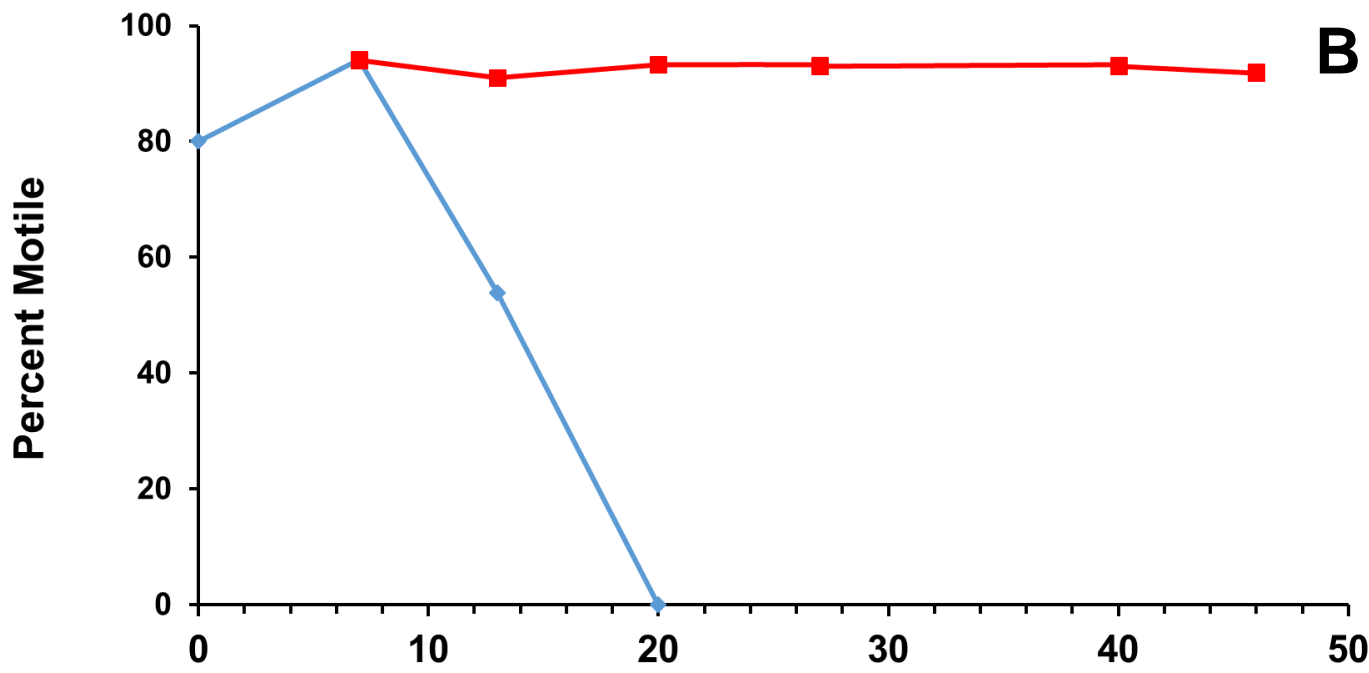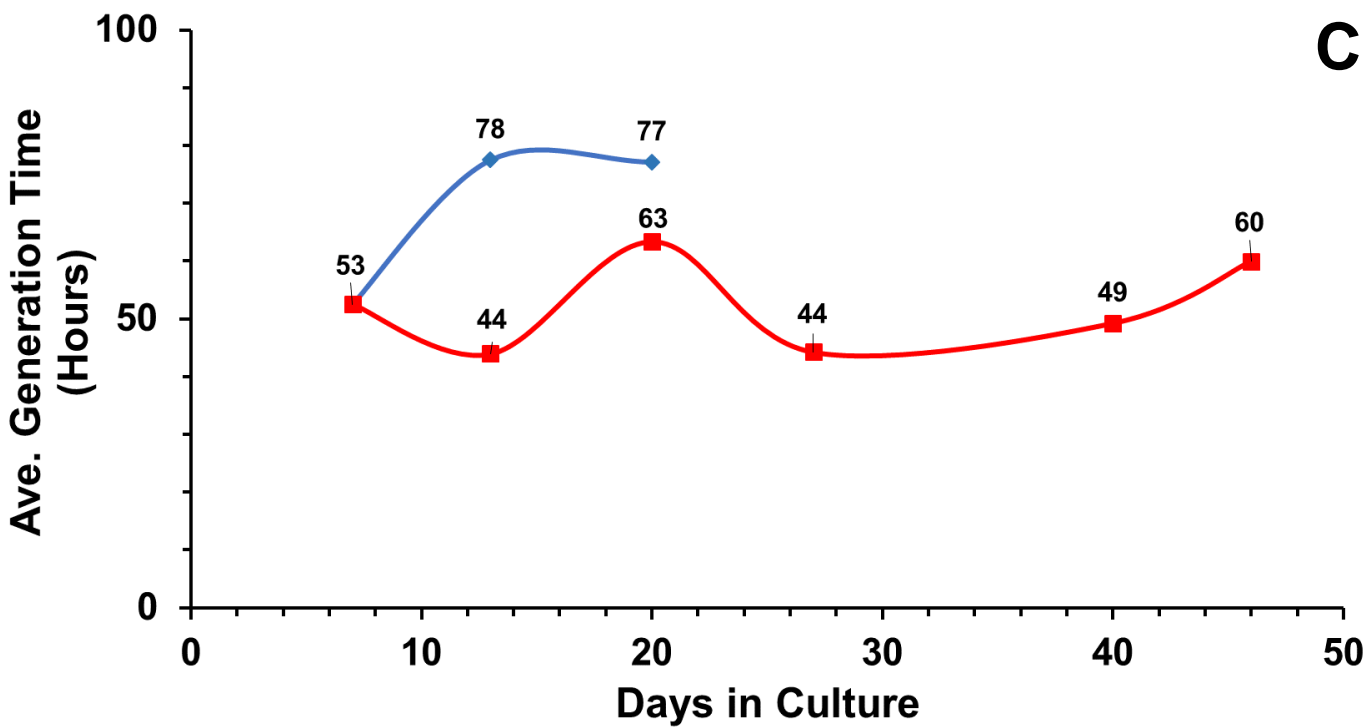

Supplement: mbo003183947sf6.pdf [file mbo003183947sf6.pdf]
